# Supplementary material
Source: publisher site journal article supplement (https://www.dovepress.com/get_supplementary_file.php?f=221625.docx)
Supplement: Supplementary file 1 [file get_supplementary_file.php]

**Supplementary material**


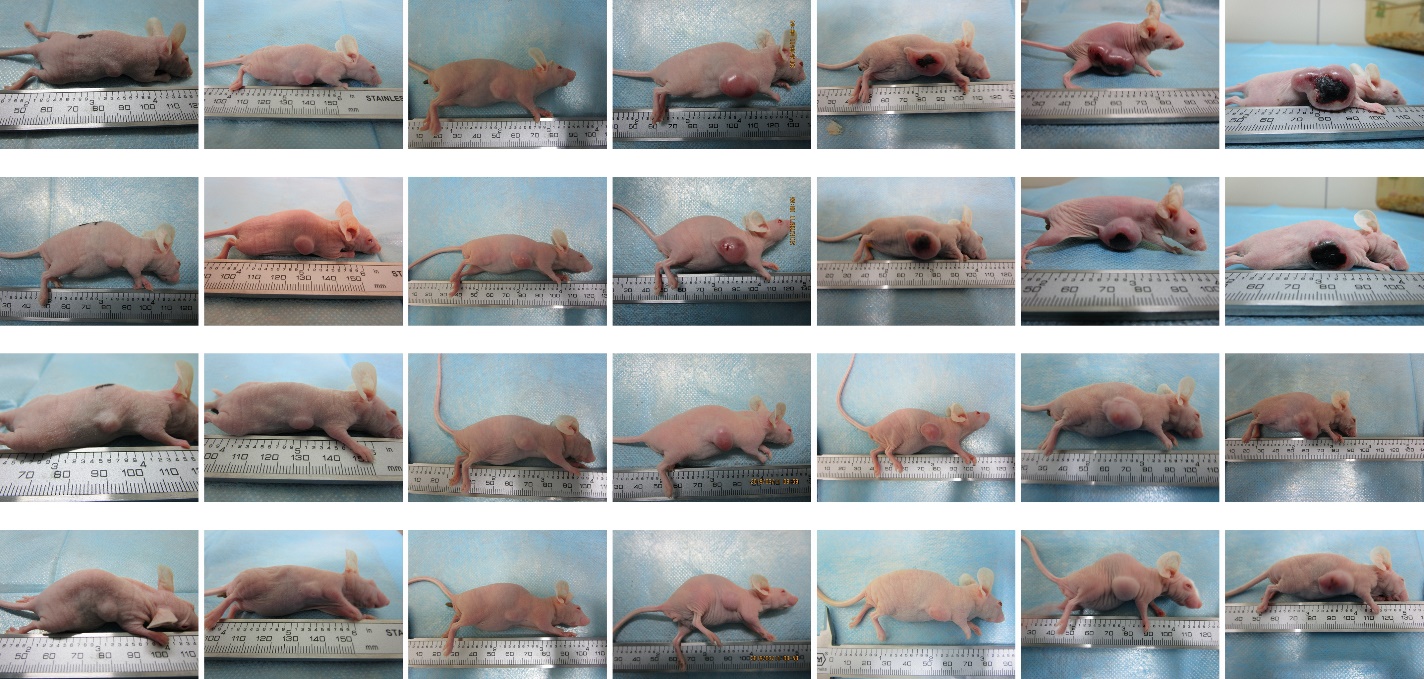


PEG-PE

PBS

Free BTM

BTM@PEG-PE

D3

D5

D7

D9

D11

D13

D15

Figure S1. Representative photos showing tumors in mice before and after treatment. Tumors are highlighted by red circles.

PEG-PE

PBS

Free BTM

BTM@PEG-PE

Heart

Liver

Spleen

Lung

Kidney


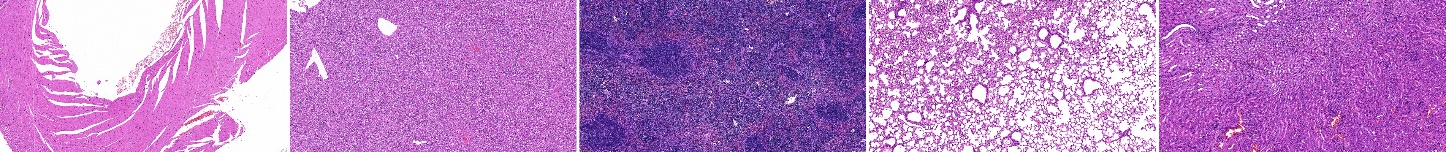

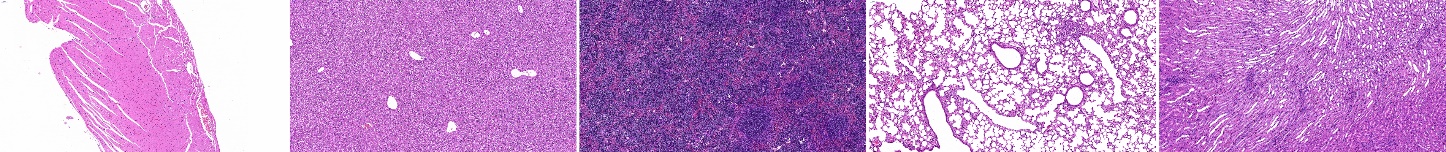

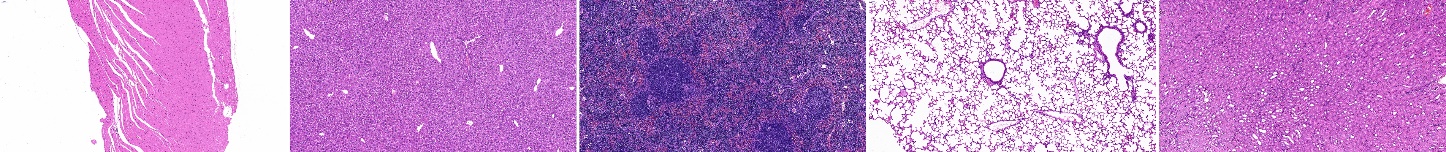

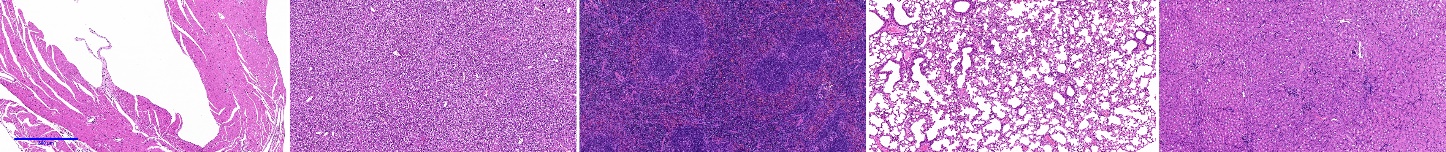


Figure S2. H&E-stained tissues after treatment, scale bar = 500 μm .
